# Supplementary figures and images for: Characterization of obstacle negotiation behaviors in the cockroach,Blaberus discoidalis
Source: Oxford University Press journal article supplement (doi:10.1242/jeb.028381), 2009-05-01

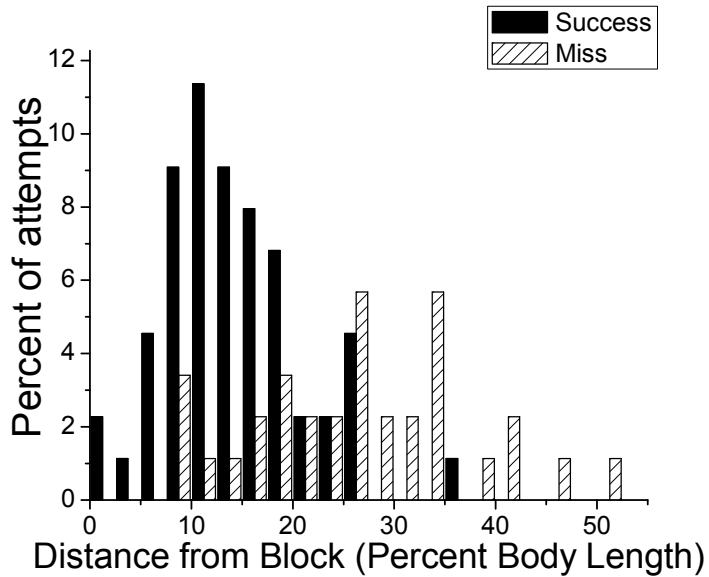

Supplement: jeb028381-sup-028381-figs1.pdf [file jeb028381-sup-028381-figs1.pdf]

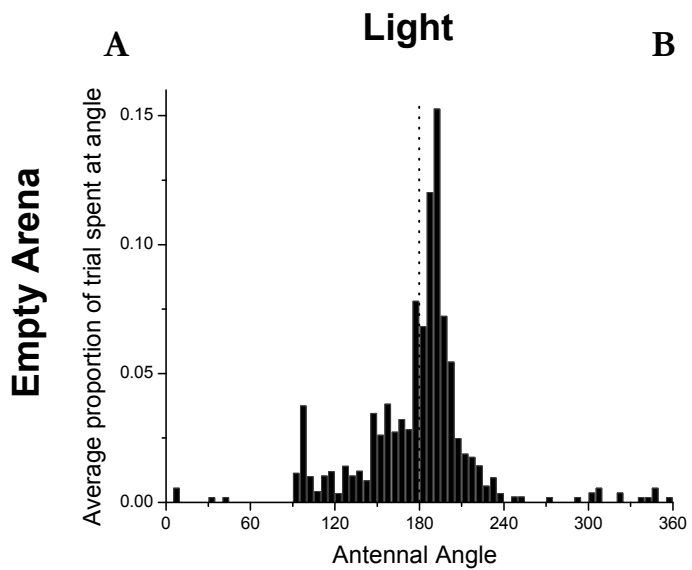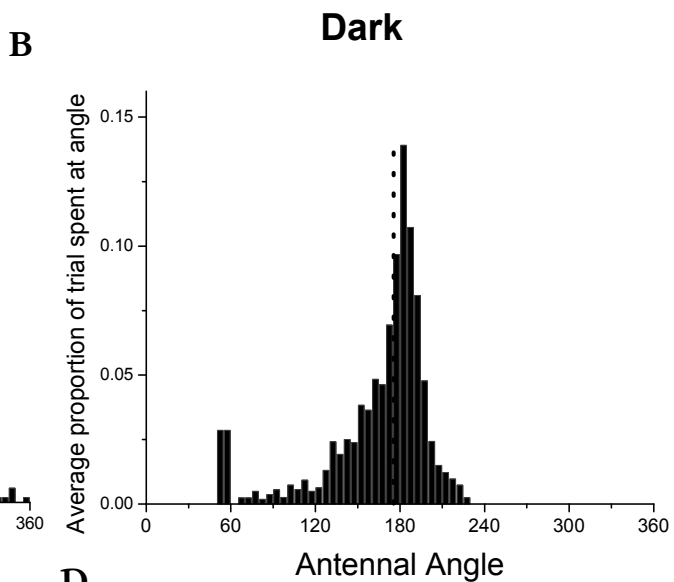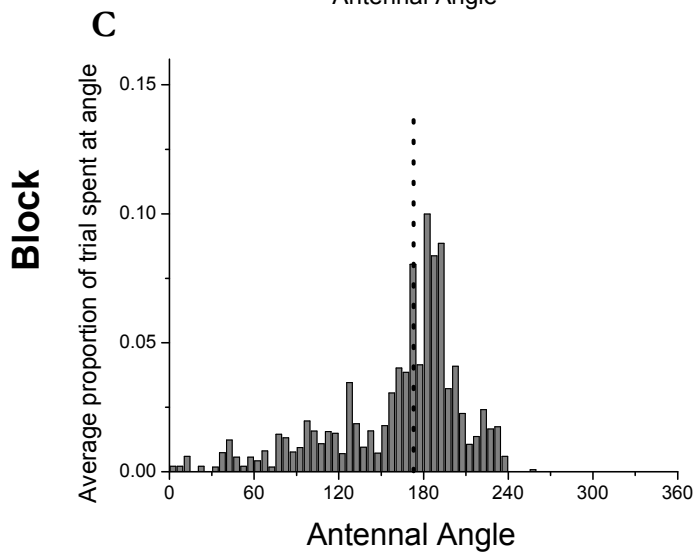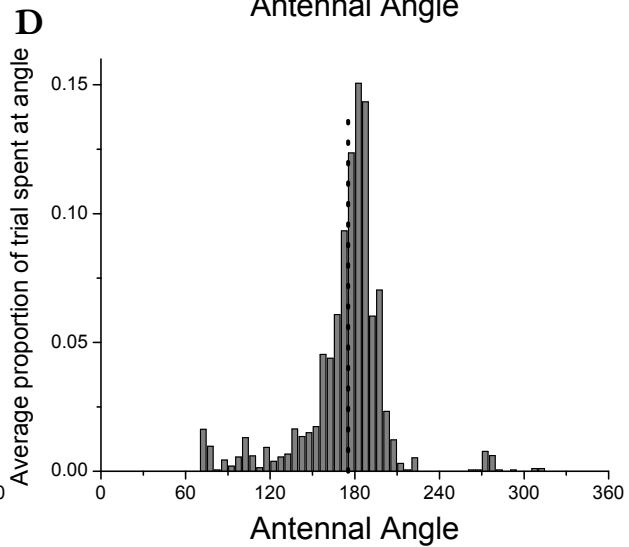

Supplement: jeb028381-sup-028381-figs2.pdf [file jeb028381-sup-028381-figs2.pdf]
